# Supplementary material
Source: PubMed Central journal article supplement (PMC3167526)
Supplement: 1018266108_sapp.pdf [file 1018266108_sapp.pdf]

## **Supporting Online Material**

### **Cell culture and sample preparation**

S2R+ cells were obtained from the Drosophila Genome Resource Center and cultured at 25°C and no CO<sub>2</sub> in culturing medium consisting of Schneiders' Drosophila Medium (Gibco #11720) with 10 mM Pen-Strep (Gibco #15070-122) and 10% fetal bovine serum (Sigma #F2442). To transfect with dsRNA,  $6.25 \times 10^6$  S2R+ cells in 0.4 ml of Schneiders' Drosophila Medium (no serum) were incubated with 15 micrograms of dsRNA and shaken gently for 1 hour at 25°C. Then the cell mixture was plated into a well of a 6-well tissue culture plate, and an additional 1.4 ml of culturing medium with 10% FBS was added to each well. The cells were placed at 25°C for 96 hours before performing assays. To transfect S2R+ cells with cDNA, Fugene HD (Roche) was used according to the manufacturer's protocol.

### **Preparation of dsRNA**

DsRNA was generated by carrying out T7 PCR reactions on a Drosophila genomic library followed by in vitro transcription of the PCR products using the MEGAscript® T7 Kit (Ambion) following the manufacturer guidelines. The dsRNA was cleaned by using an RNeasy filter kit (Qiagen). Supp. Table 3 shows the primer sequences used to make dsRNA.

### **Measurement of intracellular free calcium concentration**

Drosophila S2R+ cells were plated in 96-well plates at  $15\text{--}20 \times 10^5$  cells/well. All imaging was carried out on an Axon ImageXpress imaging system (Molecular Devices). For cytosolic Ca<sup>2+</sup> measurements, the cells were loaded for 30 minutes at 25°C with 1 μM

FURA2-AM and 0.01% Pluronic (Molecular Probes) in buffer consisting of 5 mM KCl, 125 mM NaCl, 20 mM Hepes, 1.5 mM MgCl<sub>2</sub>, 1.5 mM CaCl<sub>2</sub>, and 2.5 mM probenecid (pH 7.4). The cells were then washed once with this buffer and then subsequently imaged at 10X magnification. FURA2 timecourses of more than 200 cells were measured for each cytosolic calcium condition shown in Fig. 3.

To carry out ER calcium measurements, the D1ER FRET probe (1) was cloned into a *Drosophila* expression vector (pAW obtained from the *Drosophila* Genomic Resource Center). To make a more sensitive FRET probe, we replaced the CFP in the probe with a much brighter, mono-exponentially decaying variant, mTurquoise (2). *Drosophila* S2R<sup>+</sup> cells were transfected with the pAW- t1ER probe, and two days later when the construct was well-expressed, CFP, YFP, and FRET images were collected at 10X magnification. The images were analyzed using custom-written MATLAB scripts: the YFP images were used to create a mask to define which cells would be analyzed. The FRET ratio (R) for each cell was calculated by ratioing the background-corrected intensities in the FRET and CFP channels, and the well medians of these single-cell FRET ratios were normalized to control wells within each replicate set. The FRET ratios were converted to Ca<sup>2+</sup> concentration using methodology outlined in (3) and in Supp. Fig. 6. ER Ca<sup>2+</sup> levels were also measured indirectly using FURA2-AM, and the methodology and data are described in the Supplementary Materials.

### **Sample Preparation for Mass Spectrometry Analysis**

In order to be able to measure small changes in protein concentration between different samples, great pains were taken to make the sample preps as consistent and reproducible as possible. To prevent unwanted, early cleavage of membrane proteins, no trypsin was

used to remove the S2R+ cells from the 6-well dishes. Instead gentle trituration was used. For each sample,  $15 \times 10^6$  cells were pelleted by a low-speed spin, washed ice-cold PBS, frozen in liquid nitrogen, and resuspended in 500 $\mu$ l of ice-cold lysis buffer (10mM Hepes pH 7.9; 0.5mM MgCl<sub>2</sub>, 10 mM KCl, 1mM DTT, 0.1% digitonin, 1mM PMSF, and a complete protease inhibitor cocktail (Roche, Mannheim, Germany) at 4°C for 10 min. The cells were broken open by triturating 5 times through a 30-gauge needle and syringe, and the cell lysate was centrifuged at 3,000g for 10 min to remove the nuclear debris. The supernatant was centrifuged at 39,000 RPM (Beckman rotor TLA 120.2) for 1 hour. The pellet (membrane fraction) was resuspended in 500 $\mu$ l of 25mM NaCO<sub>3</sub> (pH 11) by pipetting thoroughly. The suspension was left on ice for 60 minutes and then pipetted 25 times with a 200 $\mu$ l pipet tip to further shear and dissolve the membranes. After the addition of 500 $\mu$ l of ammonium bicarbonate (50mM, pH 8), the suspension was centrifuged at 39,000 RPM (Beckman rotor TLA 120.2) for 30 minutes. The pellet was resuspended in 250  $\mu$ l of ammonium bicarbonate (100mM, pH 8). 60  $\mu$ l of Rapigest (Waters, 0.1% solution) was used to dissolve the pellet, after which a BCA kit (Pierce, Catalog #23225) was used to measure the concentration of the proteins in each sample.

The BCA readings were used to normalize the concentration of protein in and the volumes of each sample at this step in order to make the subsequent addition of heavy peptides, trypsin digestion, and peptide cleanup steps more consistent between samples. The heavy peptide mix was prepared as per Supp. Table 2, and an equal volume of this mix was added to each sample. The solution was then placed in a sonicator for 10 minutes.

The disulfide bonds of the proteins and AQUA peptides were reduced by incubation with tris(2-carboxyethyl)phosphine (TCEP) at a final concentration of 5 mM

for 30 minutes at 25 °C. The produced free thiols were alkylated with 15 mM iodoacetamide (Sigma) at room temperature for 30 minutes in the dark. The proteins were digested overnight at 37°C with sequencing-grade modified trypsin (Promega, Cat #V5113) added at a ratio of 1 µg per 100µg of protein. The digestion was terminated and the Rapigest degraded by acidifying the samples to pH 2-3 with HCl or formic acid and then incubating for 30 minutes at 37°C. The samples were centrifuged for 10 minutes at 9,300g to remove the Rapigest, and the supernatant, which contained the peptides, was desalted on a C18 Sep-Pak cartridge (Waters, Milford, MA, USA) and dried on a Speedvac. The peptides were resolubilized in 0.2% Acetonitrile with 0.1% formic acid. The concentration of peptides in each sample was readout at 230 nm using a Nanodrop and adjusted to be 0.6 for each sample. Having the same peptide concentration for each sample allowed for more reproducible chromatography, tighter acquisition windows, and thus better signal-to-noise.

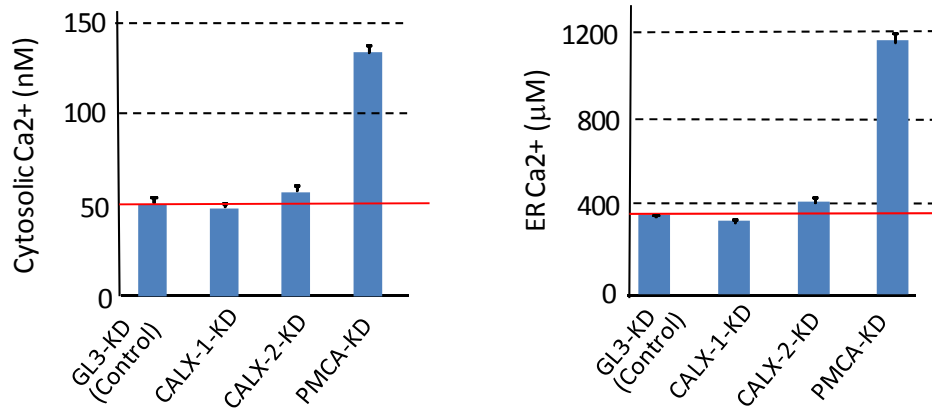

**Supp. Figure 1:** In comparison to knockdown of the plasma membrane pump PMCA, knockdown of the plasma membrane Na<sup>2+</sup>/Ca<sup>2+</sup> exchanger, CALX, showed no significant effect on basal cytosolic or ER calcium levels in *Drosophila* S2R<sup>+</sup> cells. Experiments were carried out using dsRNA targeted to two different coding regions of CALX (labeled CALX-1 and CALX-2). dsRNA targeting GL3 was used as a control. As described in the Material and Methods section, cytosolic calcium was measured using FURA2-AM, and the ER calcium was measured using the pAW-t1ER ER-targeted FRET probe. Approximately 100 cells were measured for each dsRNA knockdown condition, and the error bars show the standard error.

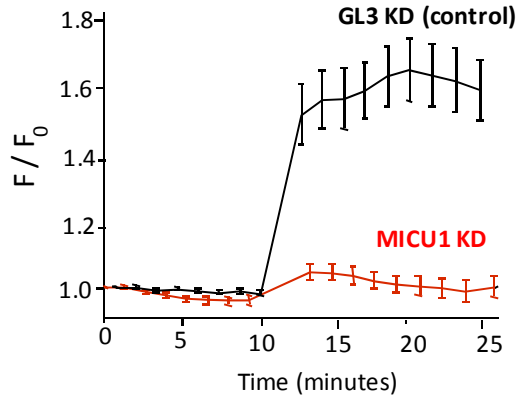

**Supp. Figure 2:** MICU1 knockdown using dsRNA results in suppression of mitochondrial calcium signals in Drosophila S2R+ cells as measured with a mitochondrially-targeted FRET probe (pAW-4mtD3cpv). To obtain this timecourse, S2R+ cells expressing pAW-4mtD3cpv were placed in extracellular buffer containing thapsagargin (1uM) and EGTA (3mM), final concentrations, for 20 minutes to deplete the ER of calcium, and images (CFP, YFP, FRET) were taken for seven timepoints. Then high calcium (10mM) and thapsagargin (1uM), final concentrations, were added to the cells, and images were taken for another 20 minutes. FRET (F) was calculated for cells by ratioing the intensities in the FRET and the CFP donor channel.  $F_0$  is the baseline FRET calculated as the average FRET value before adding stimulus. To make the pAW-4mtD3cpv probe, we obtained the 4mtD3cpv construct from Dr. Roger Tsien's lab and cloned it into a Drosophila expression vector with a constitutive actin promoter (pAW, obtained from the Drosophila Genome Resource Center). Approximately 50 cells were measured for each dsRNA knockdown condition, and the error bars show standard error. Primers to make the dsRNA are shown in Supp. Table 2 (MICU1-1).

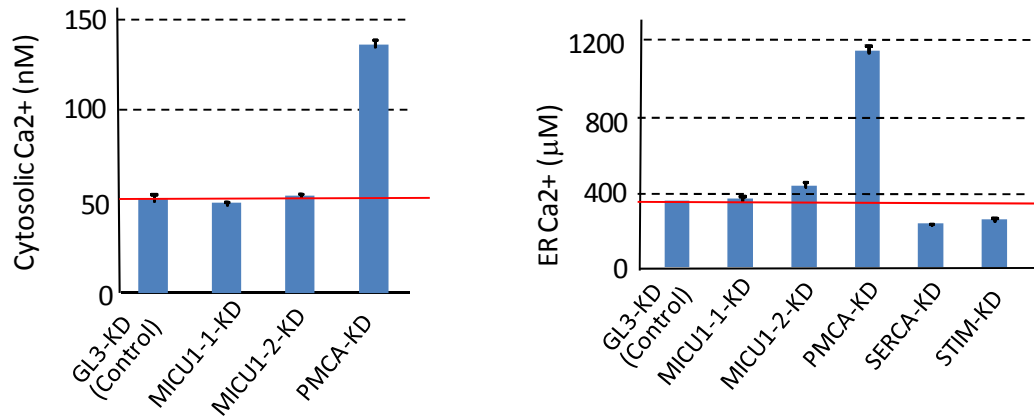

**Supp. Figure 3:** Knockdown of MICU1 showed no significant effect on basal cytosolic or ER calcium levels in *Drosophila* S2R<sup>+</sup> cells. Experiments were carried out using dsRNA targeted to two different coding regions of MICU1 (labeled MICU1-1 and MICU1-2). Calcium levels for PMCA, SERCA, and STIM knockdown are shown for comparison. dsRNA targeting GL3 was used as a control. As described in the Material and Methods section, cytosolic calcium was measured using FURA2-AM, and the ER calcium was measured using the pAW-t1ER ER-targeted FRET probe. Approximately 100 cells were measured for each dsRNA knockdown condition, and the error bars show the standard error.

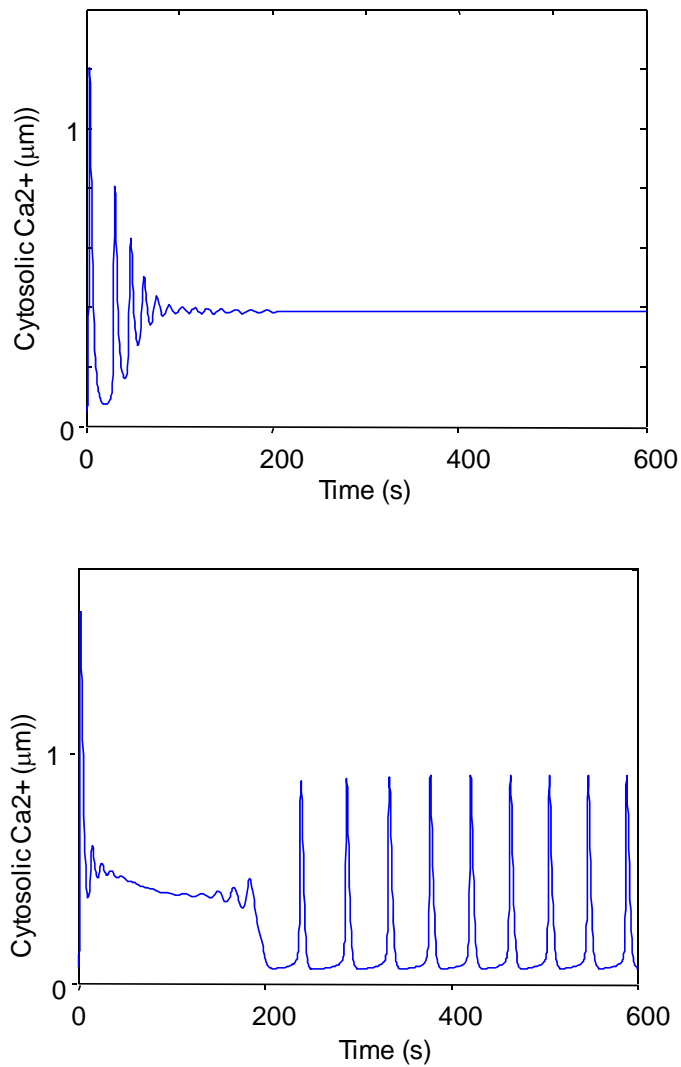

**Supp. Figure 4:** Sample model output showing complex signaling patterns. The output of the top plot would be categorized as being a “Ca<sup>2+</sup> plateau” since the oscillations decay into a stable plateau. The output in the bottom plot would be categorized as “oscillatory” since the plateau phase ends in oscillations.

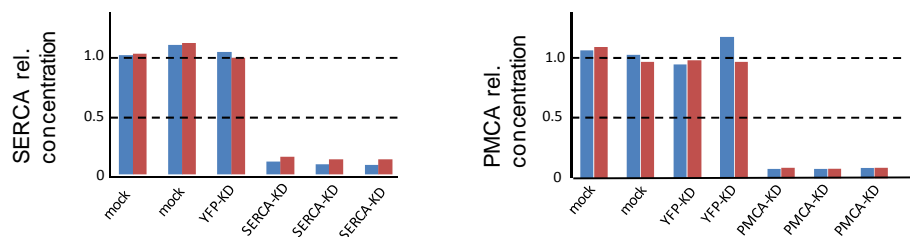

**Supp. Figure 5:** Knockdown of individual proteins can be measured using SRM mass spectrometry, as shown by use of SERCA and PMCA dsRNA.

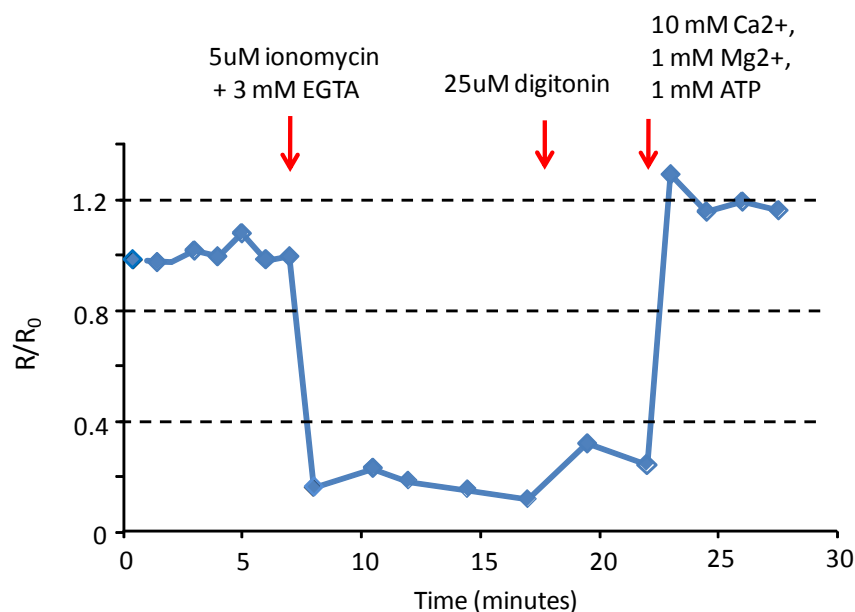

**Supp. Figure 6:** Example of a calibration timecourse for a cell transfected with the pAW-t1ER ER-targeted FRET probe. For each experiment, *Drosophila* S2R+ cells were transfected with the pAW-t1ER probe and plated into 96-well wells (approx. 100,000 cells per well). The FRET ratio ( $R$ ) for each cell was calculated by ratioing the background-corrected intensities in the FRET and CFP channels. FRET ratios were converted to  $\text{Ca}^{2+}$  concentration using the methodology outlined in (3). Cells were imaged for several frames at basal conditions to obtain  $R_0$ , the average basal ER calcium concentration. To obtain the minimal possible ER calcium level for each condition ( $R_{\min}$ ), 3 mM EGTA plus 5 uM ionomycin were added to each well, and the cells were subsequently imaged for 10 minutes or until the FRET ratio had reached a stable steady-state. To obtain an  $R_{\max}$ , cells were treated with 25 uM digitonin and left for 5 minutes in order to allow enough time for the plasma membrane to be permeabilized. Then 10 mM calcium, 1mM ATP, and 1mM  $\text{Mg}^{2+}$  was added to obtain an immediate rise in ER

$\text{Ca}^{2+}$  to its maximal value. To obtain  $\text{Ca}^{2+}$  concentration for each value of R, the  $R_{\min}$  and  $R_{\max}$  were used together with the relevant calibration equation and *in situ* parameters listed in (3).

For the *Drosophila* cells, the  $R_{\max}$  was found to be nearly the same as the signal measured when we used RNAi to knock down PMCA expression (which raises cytosolic and ER  $\text{Ca}^{2+}$ ), suggesting that we do not have the dynamic range to measure the highest increases in ER  $\text{Ca}^{2+}$ . Using the calibration procedure outlined in (3), the predicted basal ER  $\text{Ca}^{2+}$  level in *Drosophila* S2R+ cells is 350  $\mu\text{M}$ . This is an approximate measure due to the difficulty in measuring  $R_{\max}$ .

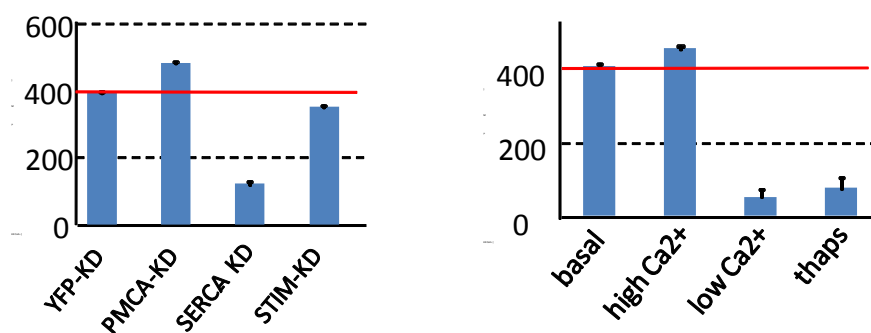

**Supp. Figure 7:** ER Ca<sup>2+</sup> levels were also derived indirectly by measuring the releasable Ca<sup>2+</sup> pool by ionomycin addition and monitoring the amplitude of the cytosolic Ca<sup>2+</sup> response using FURA2-AM. Timecourses of more than 200 cells were measured for each condition, and the error bars show standard error.

## References

1. Palmer AE & Tsien RY (2006) Measuring calcium signaling using genetically targetable fluorescent indicators. *Nat Protoc* 1(3):1057-1065.
2. Goedhart J, et al. (2010) Bright cyan fluorescent protein variants identified by fluorescence lifetime screening. *Nat Methods* 7(2):137-139.
3. Rudolf R, Magalhaes PJ, & Pozzan T (2006) Direct in vivo monitoring of sarcoplasmic reticulum Ca<sup>2+</sup> and cytosolic cAMP dynamics in mouse skeletal muscle. *J Cell Biol* 173(2):187-193.

## **Computational Models (with and without adaptive feedback)**

The rate of change of cytosolic calcium level is given by:

$$\frac{dCa_i^{2+}}{dt} = J_1 - J_2 + J_3 - J_4$$

where  $J_1$  is the flux of calcium into the cell through the plasma membrane:

$$J_1 = STIM * \left( PMleak + \frac{k_{STIM}^8}{(Ca_s^{2+})^8 + k_{STIM}^8} \right) - PMCA * \frac{(Ca_i^{2+})^2}{(Ca_i^{2+})^2 + (k_{PMCA})^2}$$

$J_2$  is the flux of calcium into the ER:

$$J_2 = SERCA * \frac{(Ca_i^{2+})^2}{(Ca_i^{2+})^2 + (k_{SERCA})^2}$$

$J_3$  is the flux of calcium into the cell from the ER (through InsP3R, Ca<sup>2+</sup>-regulated Ca<sup>2+</sup> channel, and leak):

$$J_3 = (1 - DirTransf) * Ca_s^{2+} * \left( (1 - g) * InsP3R * \frac{(InsP3)^2}{(InsP3)^2 + (InsP3R)^2} * \frac{(Ca_i^{2+})^2}{(Ca_i^{2+})^2 + (k_{InsP3Rca})^2} + ERleak \right)$$

and  $J_4$  is the flux of calcium into the mitochondria:

$$J_4 = UniPort * \frac{(Ca_i^{2+})^4}{(Ca_i^{2+})^4 + (k_{UniPort})^4} - MitNaCaEx * \left( \frac{Ca_M^{2+}}{Ca_M^{2+} + 0.01} \right)$$

The production of InsP3 depends on the catalytic activity of PLC which depends both on the degree of receptor stimulation (R) and on the Ca<sup>2+</sup> level:

$$\frac{dInsP3}{dt} = R * Ca_i^{2+} - k_{InsP3deg} * InsP3$$

$g$  represents the inactivation of the InsP3R by cytosolic calcium:

$$\frac{dg}{dt} = InsP3R_{inhibition} * \frac{(Ca_I^{2+})^4}{(k_g)^4 + (k_{InsP3R})^4} * (1 - g) - InsP3R_{recovery} * g$$

The rate of change of ER calcium is given by:

$$\frac{dCa_S^{2+}}{dt} = SERCA * \frac{(Ca_I^{2+})^2}{(Ca_I^{2+})^2 + (k_{SERCA})^2} - 1$$

The rate of change of mitochondrial calcium is given by:

$$\frac{dCa_M^{2+}}{dt} = M_1 - M_2 + M_3$$

where  $M_1$  is the flux of calcium into the mitochondria through the uniporter:

$$M_1 = UniPort * \frac{(Ca_I^{2+})^4}{(Ca_I^{2+})^4 + (k_{UniPort})^4}$$

$M_2$  is the flux of calcium out of the mitochondria through the mitochondrial Na<sup>2+</sup>/Ca<sup>2+</sup> exchanger:

$$M_2 = MitNaCaEx * \left( \frac{Ca_M^{2+}}{Ca_M^{2+} + 0.01} \right)$$

$M_3$  is the flux of calcium directly from the ER into the mitochondria:

$$M_3 = DirTransf * Ca_S^{2+} * \left( ERleak + (1 - g) * InsP3R * \frac{(InsP3)^2}{(InsP3)^2 + (InsP3R)^2} M_1 * \frac{(Ca_I^{2+})^2}{(Ca_I^{2+})^2 + (k_{InsP3R})^2} \right)$$

For Model 2 (with adaptive feedback), the following equations were added:

$$\frac{dPMCA}{dt} = PMCA_0 * cr * \left( \frac{(Ca_I^{2+})^4}{(Ca_I^{2+})^4 + (cr - 1) * (0.05)^4} \right) - ProtDeg * PMCA$$

$$\frac{dSERCA}{dt} = SERCA_0 * \frac{1}{cr} * \left( \frac{(Ca_S^{2+})^4 + (cr - 1) * 2^4}{(Ca_S^{2+})^4} \right) - ProtDeg * SERCA$$

$$\begin{aligned} \frac{dSTIM}{dt} = STIM_0 * \frac{1}{(cr * cr)} * & \left( \frac{(Ca_S^{2+})^2 + (cr - 1) * 2^2}{(Ca_S^{2+})^2} \right) \\ & * \left( \frac{(Ca_I^{2+})^2 + (cr - 1) * (0.05)^2}{(Ca_I^{2+})^2} \right) - ProtDeg * STIM \end{aligned}$$

where  $PMCA_0$ ,  $SERCA_0$ , and  $STIM_0$  are setpoints of unregulated equilibria, and  $cr = 50$  represents a regulatory ceiling.

The fixed parameters used in the models were:  $InsP3R_0=3.0$  (rel unit);  $SERCA_0=0.266$ ;  $InsP3degradation=2.0/sec$ ;  $InsP3Rinhibition=5.0/sec$ ;  $InsP3Rrecovery=0.018/sec$ ;  $kSERCA=0.175$  microM;  $ERleak=0.01/sec$ ; stimulation  $R=0$  to 4;  $kInsP3R=0.175$  microM;  $PMleak=0.0346/sec$ ;  $STIM_0=0.02$ ;  $kInsP3Rca=0.13$  microM;  $kSTIM=1.0$ ;  $kPMCA=0.2$ ;  $PMCA_0=0.013$ ;  $kG=1.0$ ;  $DirTransf=0.03$ ;  $MitNaCaEx=0.0050$ ;  $UniPort=0.03$ ;  $kUniP=0.6$ .

For Model 2 (with adaptive feedback), the following parameter was added to establish the adaptive feedback loops:  $ProtDeg=0.00003/sec$  (protein turnover, same for STIM, PMCA and SERCA).

Matlab Simbiology was used to program and run the model simulations. The models presented in this manuscript, without and with adaptive feedback, will be uploaded to the EMBL-EBI BioModels repository (<http://www.ebi.ac.uk/biomodels-main/>).

**Supp. Table 1: List of measured peptides and transitions**

| m/z Q1   | m/z Q3    | CE [V] | Sequence            | fragment | light,heavy | Peptide Name | Gene Symb | CG#       | NP#                        | Gene Description                                |
|----------|-----------|--------|---------------------|----------|-------------|--------------|-----------|-----------|----------------------------|-------------------------------------------------|
| 472.2640 | 545.3042  | 19.4   | SPITSSVPR           | y5       | light       | ORAI-2       | olf186-F  | CG11430   | NP 611273.1                | CG11430 gene product from transcript CG11430-RB |
| 472.2640 | 646.3519  | 19.4   | SPITSSVPR           | y6       | light       | ORAI-2       | olf186-F  | CG11430   | NP 611273.1                | CG11430 gene product from transcript CG11430-RB |
| 472.2640 | 759.4359  | 19.4   | SPITSSVPR           | y7       | light       | ORAI-2       | olf186-F  | CG11430   | NP 611273.1                | CG11430 gene product from transcript CG11430-RB |
| 477.2640 | 555.3042  | 19.4   | SPITSSVPR           | y5       | heavy       | ORAI-2       | olf186-F  | CG11430   | NP 611273.1                | CG11430 gene product from transcript CG11430-RB |
| 477.2640 | 656.3519  | 19.4   | SPITSSVPR           | y6       | heavy       | ORAI-2       | olf186-F  | CG11430   | NP 611273.1                | CG11430 gene product from transcript CG11430-RB |
| 477.2640 | 769.4359  | 19.4   | SPITSSVPR           | y7       | heavy       | ORAI-2       | olf186-F  | CG11430   | NP 611273.1                | CG11430 gene product from transcript CG11430-RB |
| 512.2771 | 531.3249  | 20.7   | YEVTVSGIR           | y5       | light       | ORAI-1       | olf186-F  | CG16944   | NP 727448.1 or NP 511109.6 | CG11430 gene product from transcript CG11430-RB |
| 512.2771 | 632.3726  | 20.7   | YEVTVSGIR           | y6       | light       | ORAI-1       | olf186-F  | CG16944   | NP 727448.1 or NP 511109.6 | CG11430 gene product from transcript CG11430-RB |
| 512.2771 | 731.4410  | 20.7   | YEVTVSGIR           | y7       | light       | ORAI-1       | olf186-F  | CG16944   | NP 727448.1 or NP 511109.6 | CG11430 gene product from transcript CG11430-RB |
| 515.9254 | 545.2790  | 26     | QIEVQSTQSGNAQR      | y5       | light       | PRES-1       | Psn       | CG18803   | NP 001137988.1             | Presenilin                                      |
| 515.9254 | 632.3111  | 26     | QIEVQSTQSGNAQR      | y6       | light       | PRES-1       | Psn       | CG18803   | NP 001137988.1             | Presenilin                                      |
| 515.9254 | 760.3696  | 26     | QIEVQSTQSGNAQR      | y7       | light       | PRES-1       | Psn       | CG18803   | NP 001137988.1             | Presenilin                                      |
| 517.2771 | 541.3249  | 20.7   | YEVTVSGIR           | y5       | heavy       | ORAI-1       | olf186-F  | CG11434   | NP 611273.1                | CG11430 gene product from transcript CG11430-RB |
| 517.2771 | 642.3726  | 20.7   | YEVTVSGIR           | y6       | heavy       | ORAI-1       | olf186-F  | CG11434   | NP 611273.1                | CG11430 gene product from transcript CG11430-RB |
| 517.2771 | 741.4410  | 20.7   | YEVTVSGIR           | y7       | heavy       | ORAI-1       | olf186-F  | CG11434   | NP 611273.1                | CG11430 gene product from transcript CG11430-RB |
| 519.2587 | 555.2790  | 26     | QIEVQSTQSGNAQR      | y5       | heavy       | PRES-1       | Psn       | CG18803   | NP 001137988.1             | Presenilin                                      |
| 519.2587 | 642.3111  | 26     | QIEVQSTQSGNAQR      | y6       | heavy       | PRES-1       | Psn       | CG18803   | NP 001137988.1             | Presenilin                                      |
| 519.2587 | 770.3696  | 26     | QIEVQSTQSGNAQR      | y7       | heavy       | PRES-1       | Psn       | CG18803   | NP 001137988.1             | Presenilin                                      |
| 570.8004 | 635.3763  | 22.7   | SAEAFLEFVK          | y5       | light       | ERP44-1      | CG9911    | CG9911    | NP 573111.1 or NP 727949.1 | CG9911 gene product from transcript CG9911-RD   |
| 570.8004 | 782.4447  | 22.7   | SAEAFLEFVK          | y6       | light       | ERP44-1      | CG9911    | CG9911    | NP 573111.1 or NP 727949.1 | CG9911 gene product from transcript CG9911-RD   |
| 570.8004 | 853.4818  | 22.7   | SAEAFLEFVK          | y7       | light       | ERP44-1      | CG9911    | CG9911    | NP 573111.1 or NP 727949.1 | CG9911 gene product from transcript CG9911-RD   |
| 570.8004 | 982.5244  | 22.7   | SAEAFLEFVK          | y8       | light       | ERP44-1      | CG9911    | CG9911    | NP 573111.1 or NP 727949.1 | CG9911 gene product from transcript CG9911-RD   |
| 574.8004 | 643.3763  | 22.7   | SAEAFLEFVK          | y5       | heavy       | ERP44-1      | CG9911    | CG9911    | NP 573111.1 or NP 727949.1 | CG9911 gene product from transcript CG9911-RD   |
| 574.8004 | 790.4447  | 22.7   | SAEAFLEFVK          | y6       | heavy       | ERP44-1      | CG9911    | CG9911    | NP 573111.1 or NP 727949.1 | CG9911 gene product from transcript CG9911-RD   |
| 574.8004 | 861.4818  | 22.7   | SAEAFLEFVK          | y7       | heavy       | ERP44-1      | CG9911    | CG9911    | NP 573111.1 or NP 727949.1 | CG9911 gene product from transcript CG9911-RD   |
| 574.8004 | 990.5244  | 22.7   | SAEAFLEFVK          | y8       | heavy       | ERP44-1      | CG9911    | CG9911    | NP 573111.1 or NP 727949.1 | CG9911 gene product from transcript CG9911-RD   |
| 597.3117 | 562.3195  | 23.6   | DFAAGGISAAYSK       | y6       | light       | MITCAR-1     | sesB      | CG16944   | NP 727448.1 or NP 511109.6 | stress-sensitive B                              |
| 597.3117 | 789.4465  | 23.6   | DFAAGGISAAYSK       | y9       | light       | MITCAR-1     | sesB      | CG16944   | NP 727448.1 or NP 511109.6 | stress-sensitive B                              |
| 597.3117 | 860.4836  | 23.6   | DFAAGGISAAYSK       | y10      | light       | MITCAR-1     | sesB      | CG16944   | NP 727448.1 or NP 511109.6 | stress-sensitive B                              |
| 597.3117 | 931.5207  | 23.6   | DFAAGGISAAYSK       | y11      | light       | MITCAR-1     | sesB      | CG16944   | NP 727448.1 or NP 511109.6 | stress-sensitive B                              |
| 601.3117 | 570.3195  | 23.6   | DFAAGGISAAYSK       | y6       | heavy       | MITCAR-1     | sesB      | CG16944   | NP 727448.1 or NP 511109.6 | stress-sensitive B                              |
| 601.3117 | 797.4465  | 23.6   | DFAAGGISAAYSK       | y9       | heavy       | MITCAR-1     | sesB      | CG16944   | NP 727448.1 or NP 511109.6 | stress-sensitive B                              |
| 601.3117 | 868.4836  | 23.6   | DFAAGGISAAYSK       | y10      | heavy       | MITCAR-1     | sesB      | CG16944   | NP 727448.1 or NP 511109.6 | stress-sensitive B                              |
| 601.3117 | 939.5207  | 23.6   | DFAAGGISAAYSK       | y11      | heavy       | MITCAR-1     | sesB      | CG16944   | NP 727448.1 or NP 511109.6 | stress-sensitive B                              |
| 625.3122 | 646.3519  | 24.6   | DGNFGISAAELR        | y6       | light       | CAM-3        | Cam       | CG8472    | NP 523710.1                | Calmodulin                                      |
| 625.3122 | 759.4359  | 24.6   | DGNFGISAAELR        | y7       | light       | CAM-3        | Cam       | CG8472    | NP 523710.1                | Calmodulin                                      |
| 630.3122 | 656.3519  | 24.6   | DGNFGISAAELR        | y6       | heavy       | CAM-3        | Cam       | CG8472    | NP 523710.1                | Calmodulin                                      |
| 630.3122 | 769.4359  | 24.6   | DGNFGISAAELR        | y7       | heavy       | CAM-3        | Cam       | CG8472    | NP 523710.1                | Calmodulin                                      |
| 665.2853 | 509.2024  | 32.6   | HLDACETMGNATAICSDK  | y4       | light       | PMCA-3       | PMCA      | CG34036.C | NP 001014687.3             | plasma membrane calcium ATPase                  |
| 665.2853 | 622.2865  | 32.6   | HLDACETMGNATAICSDK  | y5       | light       | PMCA-3       | PMCA      | CG34036.C | NP 001014687.3             | plasma membrane calcium ATPase                  |
| 665.2853 | 693.3236  | 32.6   | HLDACETMGNATAICSDK  | y6       | light       | PMCA-3       | PMCA      | CG34036.C | NP 001014687.3             | plasma membrane calcium ATPase                  |
| 665.2853 | 794.3713  | 32.6   | HLDACETMGNATAICSDK  | y7       | light       | PMCA-3       | PMCA      | CG34036.C | NP 001014687.3             | plasma membrane calcium ATPase                  |
| 667.9519 | 517.2024  | 32.6   | HLDACETMGNATAICSDK  | y4       | heavy       | PMCA-3       | PMCA      | CG34036.C | NP 001014687.3             | plasma membrane calcium ATPase                  |
| 667.9519 | 630.2865  | 32.6   | HLDACETMGNATAICSDK  | y5       | heavy       | PMCA-3       | PMCA      | CG34036.C | NP 001014687.3             | plasma membrane calcium ATPase                  |
| 667.9519 | 701.3236  | 32.6   | HLDACETMGNATAICSDK  | y6       | heavy       | PMCA-3       | PMCA      | CG34036.C | NP 001014687.3             | plasma membrane calcium ATPase                  |
| 667.9519 | 802.3713  | 32.6   | HLDACETMGNATAICSDK  | y7       | heavy       | PMCA-3       | PMCA      | CG34036.C | NP 001014687.3             | plasma membrane calcium ATPase                  |
| 675.3163 | 663.3130  | 26.3   | LTDEVDENMR          | y5       | light       | CAM-1        | Cam       | CG8472    | NP 523710.1                | Calmodulin                                      |
| 675.3163 | 762.3815  | 26.3   | LTDEVDENMR          | y6       | light       | CAM-1        | Cam       | CG8472    | NP 523710.1                | Calmodulin                                      |
| 675.3163 | 1135.4936 | 26.3   | LTDEVDENMR          | y9       | light       | CAM-1        | Cam       | CG8472    | NP 523710.1                | Calmodulin                                      |
| 676.8019 | 638.3144  | 26.3   | ASEDPQSASFDAK       | y6       | light       | Insp3R-1     | ltp-r83A  | CG1063    | NP 730941.1                | Inositol 1,4,5,-tris-phosphate receptor         |
| 676.8019 | 725.3464  | 26.3   | ASEDPQSASFDAK       | y7       | light       | Insp3R-1     | ltp-r83A  | CG1063    | NP 730941.1                | Inositol 1,4,5,-tris-phosphate receptor         |
| 676.8019 | 950.4578  | 26.3   | ASEDPQSASFDAK       | y9       | light       | Insp3R-1     | ltp-r83A  | CG1063    | NP 730941.1                | Inositol 1,4,5,-tris-phosphate receptor         |
| 680.3163 | 673.3130  | 26.3   | LTDEVDENMR          | y5       | heavy       | CAM-1        | Cam       | CG8472    | NP 523710.1                | Calmodulin                                      |
| 680.3163 | 772.3815  | 26.3   | LTDEVDENMR          | y6       | heavy       | CAM-1        | Cam       | CG8472    | NP 523710.1                | Calmodulin                                      |
| 680.3163 | 1145.4936 | 26.3   | LTDEVDENMR          | y9       | heavy       | CAM-1        | Cam       | CG8472    | NP 523710.1                | Calmodulin                                      |
| 680.8019 | 646.3144  | 26.3   | ASEDPQSASFDAK       | y6       | heavy       | Insp3R-1     | ltp-r83A  | CG1063    | NP 730941.1                | Inositol 1,4,5,-tris-phosphate receptor         |
| 680.8019 | 733.3464  | 26.3   | ASEDPQSASFDAK       | y7       | heavy       | Insp3R-1     | ltp-r83A  | CG1063    | NP 730941.1                | Inositol 1,4,5,-tris-phosphate receptor         |
| 680.8019 | 958.4578  | 26.3   | ASEDPQSASFDAK       | y9       | heavy       | Insp3R-1     | ltp-r83A  | CG1063    | NP 730941.1                | Inositol 1,4,5,-tris-phosphate receptor         |
| 726.7041 | 665.3770  | 35.3   | LVANNGLNVPVYEDPFVFR | y5       | light       | PLCNORP-1    | norpA     | CG362     | NP 995604.1                | no receptor potential A                         |
| 726.7041 | 1023.4894 | 35.3   | LVANNGLNVPVYEDPFVFR | y8       | light       | PLCNORP-1    | norpA     | CG11430   | NP 611273.1                | no receptor potential A                         |
| 726.7041 | 1186.5528 | 35.3   | LVANNGLNVPVYEDPFVFR | y9       | light       | PLCNORP-1    | norpA     | CG11430   | NP 611273.1                | no receptor potential A                         |
| 729.8628 | 432.2201  | 28.1   | NALGDVTNELQER       | y3       | light       | STIM-2       | Stim      | CG9126    | NP 996470.1                | Stromal interaction molecule                    |
| 729.8628 | 545.3042  | 28.1   | NALGDVTNELQER       | y4       | light       | STIM-2       | Stim      | CG9126    | NP 996470.1                | Stromal interaction molecule                    |
| 729.8628 | 788.3897  | 28.1   | NALGDVTNELQER       | y6       | light       | STIM-2       | Stim      | CG9126    | NP 996470.1                | Stromal interaction molecule                    |
| 729.8628 | 889.4374  | 28.1   | NALGDVTNELQER       | y7       | light       | STIM-2       | Stim      | CG9126    | NP 996470.1                | Stromal interaction molecule                    |
| 730.0375 | 675.3770  | 35.3   | LVANNGLNVPVYEDPFVFR | y5       | heavy       | PLCNORP-1    | norpA     | CG362     | NP 995604.1                | no receptor potential A                         |
| 730.0375 | 1033.4894 | 35.3   | LVANNGLNVPVYEDPFVFR | y8       | heavy       | PLCNORP-1    | norpA     | CG11430   | NP 611273.1                | no receptor potential A                         |
| 730.0375 | 1196.5528 | 35.3   | LVANNGLNVPVYEDPFVFR | y9       | heavy       | PLCNORP-1    | norpA     | CG11430   | NP 611273.1                | no receptor potential A                         |
| 734.8628 | 442.2201  | 28.1   | NALGDVTNELQER       | y3       | heavy       | STIM-2       | Stim      | CG9126    | NP 996470.1                | Stromal interaction molecule                    |
| 734.8628 | 555.3042  | 28.1   | NALGDVTNELQER       | y4       | heavy       | STIM-2       | Stim      | CG9126    | NP 996470.1                | Stromal interaction molecule                    |
| 734.8628 | 798.3897  | 28.1   | NALGDVTNELQER       | y6       | heavy       | STIM-2       | Stim      | CG9126    | NP 996470.1                | Stromal interaction molecule                    |
| 734.8628 | 899.4374  | 28.1   | NALGDVTNELQER       | y7       | heavy       | STIM-2       | Stim      | CG9126    | NP 996470.1                | Stromal interaction molecule                    |
| 766.8594 | 581.3293  | 29.4   | FGSSSESLSTFVK       | y5       | light       | DISIS-1      | Erp60     | CG8983    | NP 524211.1                | CG8983 gene product from transcript CG8983-RA   |
| 766.8594 | 694.4134  | 29.4   | FGSSSESLSTFVK       | y6       | light       | DISIS-1      | Erp60     | CG8983    | NP 524211.1                | CG8983 gene product from transcript CG8983-RA   |
| 766.8594 | 896.4724  | 29.4   | FGSSSESLSTFVK       | y8       | light       | DISIS-1      | Erp60     | CG8983    | NP 524211.1                | CG8983 gene product from transcript CG8983-RA   |
| 766.8594 | 1112.5470 | 29.4   | FGSSSESLSTFVK       | y10      | light       | DISIS-1      | Erp60     | CG8983    | NP 524211.1                | CG8983 gene product from transcript CG8983-RA   |
| 770.8594 | 589.3293  | 29.4   | FGSSSESLSTFVK       | y5       | heavy       | DISIS-1      | Erp60     | CG8983    | NP 524211.1                | CG8983 gene product from transcript CG8983-RA   |
| 770.8594 | 702.4134  | 29.4   | FGSSSESLSTFVK       | y6       | heavy       | DISIS-1      | Erp60     | CG8983    | NP 524211.1                | CG8983 gene product from transcript CG8983-RA   |
| 770.8594 | 904.4724  | 29.4   | FGSSSESLSTFVK       | y8       | heavy       | DISIS-1      | Erp60     | CG8983    | NP 524211.1                | CG8983 gene product from transcript CG8983-RA   |
| 770.8594 | 1120.5470 | 29.4   | FGSSSESLSTFVK       | y10      | heavy       | DISIS-1      | Erp60     | CG8983    | NP 524211.1                | CG8983 gene product from transcript CG8983-RA   |
| 772.4325 | 460.2766  | 29.6   | VGEATETALVLAIEK     | y4       | light       | SERCA-2      | Ca-P60A   | CG3725    | NP 476832.1                | Calcium ATPase at 60A                           |
| 772.4325 | 559.3450  | 29.6   | VGEATETALVLAIEK     | y5       | light       | SERCA-2      | Ca-P60A   | CG3725    | NP 476832.1                | Calcium ATPase at 60A                           |
| 772.4325 | 785.5131  | 29.6   | VGEATETALVLAIEK     | y7       | light       | SERCA-2      | Ca-P60A   | CG3725    | NP 476832.1                | Calcium ATPase at 60A                           |
| 772.4325 | 957.5979  | 29.6   | VGEATETALVLAIEK     | y9       | light       | SERCA-2      | Ca-P60A   | CG3725    | NP 476832.1                | Calcium ATPase at 60A                           |
| 776.4325 | 468.2766  | 29.6   | VGEATETALVLAIEK     | y4       | heavy       | SERCA-2      | Ca-P60A   | CG3725    | NP 476832.1                | Calcium ATPase at 60A                           |
| 776.4325 | 567.3450  | 29.6   | VGEATETALVLAIEK     | y5       | heavy       | SERCA-2      | Ca-P60A   | CG3725    | NP 476832.1                | Calcium ATPase at 60A                           |
| 776.4325 | 793.5131  | 29.6   | VGEATETALVLAIEK     | y7       | heavy       | SERCA-2      | Ca-P60A   | CG3725    | NP 476832.1                | Calcium ATPase at 60A                           |
| 776.4325 | 965.5979  | 29.6   | VGEATETALVLAIEK     | y9       | heavy       | SERCA-2      | Ca-P60A   | CG3725    | NP 476832.1                | Calcium ATPase at 60A                           |
| 778.4143 | 505.2617  | 29.8   | EIVPGDLVEVSGDK      | y5       | light       | SERCA-3      | Ca-P60A   | CG3725    | NP 476832.1                | Calcium ATPase at 60A                           |
| 778.4143 | 604.3301  | 29.8   | EIVPGDLVEVSGDK      | y6       | light       | SERCA-3      | Ca-P60A   | CG3725    | NP 476832.1                | Calcium ATPase at 60A                           |
| 778.4143 | 733.3727  | 29.8   | EIVPGDLVEVSGDK      | y7       | light       | SERCA-3      | Ca-P60A   | CG3725    | NP 476832.1                | Calcium ATPase at 60A                           |
| 778.4143 | 832.4411  | 29.8   | EIVPGDLVEVSGDK      | y8       | light       | SERCA-3      | Ca-P60A   | CG3725    | NP 476832.1                | Calcium ATPase at 60A                           |

**Supp. Table 1: List of measured peptides and transitions (continued)**

| m/z Q1   | m/z Q3    | CE [V] | Sequence               | fragment | light,heavy | Peptide Name | Gene Symb | CG#       | NP#            | Gene Description                                |
|----------|-----------|--------|------------------------|----------|-------------|--------------|-----------|-----------|----------------|-------------------------------------------------|
| 794.9433 | 446.2973  | 30.3   | IDQSILTGESVSVIK        | y4       | light       | SERCA-1      | Ca-P60A   | CG18803   | NP_001137988.1 | Calcium ATPase at 60A                           |
| 794.9433 | 818.4618  | 30.3   | IDQSILTGESVSVIK        | y8       | light       | SERCA-1      | Ca-P60A   | CG18803   | NP_001137988.1 | Calcium ATPase at 60A                           |
| 794.9433 | 919.5095  | 30.3   | IDQSILTGESVSVIK        | y9       | light       | SERCA-1      | Ca-P60A   | CG18803   | NP_001137988.1 | Calcium ATPase at 60A                           |
| 794.9433 | 1032.5936 | 30.3   | IDQSILTGESVSVIK        | y10      | light       | SERCA-1      | Ca-P60A   | CG18803   | NP_001137988.1 | Calcium ATPase at 60A                           |
| 798.9433 | 454.2973  | 30.3   | IDQSILTGESVSVIK        | y4       | heavy       | SERCA-1      | Ca-P60A   | CG18803   | NP_001137988.1 | Calcium ATPase at 60A                           |
| 798.9433 | 826.4618  | 30.3   | IDQSILTGESVSVIK        | y8       | heavy       | SERCA-1      | Ca-P60A   | CG18803   | NP_001137988.1 | Calcium ATPase at 60A                           |
| 798.9433 | 927.5095  | 30.3   | IDQSILTGESVSVIK        | y9       | heavy       | SERCA-1      | Ca-P60A   | CG18803   | NP_001137988.1 | Calcium ATPase at 60A                           |
| 798.9433 | 1040.5936 | 30.3   | IDQSILTGESVSVIK        | y10      | heavy       | SERCA-1      | Ca-P60A   | CG18803   | NP_001137988.1 | Calcium ATPase at 60A                           |
| 804.9082 | 560.3191  | 30.7   | EICTLGFDLWQVK          | y4       | light       | CALRET-1     | Crc       | CG9429    | NP_524293.2    | Calreticulin                                    |
| 804.9082 | 788.4301  | 30.7   | EICTLGFDLWQVK          | y6       | light       | CALRET-1     | Crc       | CG9429    | NP_524293.2    | Calreticulin                                    |
| 804.9082 | 992.5200  | 30.7   | EICTLGFDLWQVK          | y8       | light       | CALRET-1     | Crc       | CG9429    | NP_524293.2    | Calreticulin                                    |
| 808.9082 | 568.3191  | 30.7   | EICTLGFDLWQVK          | y4       | heavy       | CALRET-1     | Crc       | CG9429    | NP_524293.2    | Calreticulin                                    |
| 808.9082 | 796.4301  | 30.7   | EICTLGFDLWQVK          | y6       | heavy       | CALRET-1     | Crc       | CG9429    | NP_524293.2    | Calreticulin                                    |
| 808.9082 | 1000.5200 | 30.7   | EICTLGFDLWQVK          | y8       | heavy       | CALRET-1     | Crc       | CG9429    | NP_524293.2    | Calreticulin                                    |
| 821.9178 | 428.2867  | 31.3   | EVVAVTGDDGTNDGPALK     | y4       | light       | PMCA-1       | PMCA      | CG34036.C | NP_001014687.3 | plasma membrane calcium ATPase                  |
| 821.9178 | 485.3082  | 31.3   | EVVAVTGDDGTNDGPALK     | y5       | light       | PMCA-1       | PMCA      | CG34036.C | NP_001014687.3 | plasma membrane calcium ATPase                  |
| 821.9178 | 872.4472  | 31.3   | EVVAVTGDDGTNDGPALK     | y9       | light       | PMCA-1       | PMCA      | CG34036.C | NP_001014687.3 | plasma membrane calcium ATPase                  |
| 821.9178 | 1044.4956 | 31.3   | EVVAVTGDDGTNDGPALK     | y11      | light       | PMCA-1       | PMCA      | CG34036.C | NP_001014687.3 | plasma membrane calcium ATPase                  |
| 821.9178 | 1145.5433 | 31.3   | EVVAVTGDDGTNDGPALK     | y12      | light       | PMCA-1       | PMCA      | CG34036.C | NP_001014687.3 | plasma membrane calcium ATPase                  |
| 825.9178 | 436.2867  | 31.3   | EVVAVTGDDGTNDGPALK     | y4       | heavy       | PMCA-1       | PMCA      | CG34036.C | NP_001014687.3 | plasma membrane calcium ATPase                  |
| 825.9178 | 493.3082  | 31.3   | EVVAVTGDDGTNDGPALK     | y5       | heavy       | PMCA-1       | PMCA      | CG34036.C | NP_001014687.3 | plasma membrane calcium ATPase                  |
| 825.9178 | 880.4472  | 31.3   | EVVAVTGDDGTNDGPALK     | y9       | heavy       | PMCA-1       | PMCA      | CG34036.C | NP_001014687.3 | plasma membrane calcium ATPase                  |
| 825.9178 | 1052.4956 | 31.3   | EVVAVTGDDGTNDGPALK     | y11      | heavy       | PMCA-1       | PMCA      | CG34036.C | NP_001014687.3 | plasma membrane calcium ATPase                  |
| 825.9178 | 1153.5433 | 31.3   | EVVAVTGDDGTNDGPALK     | y12      | heavy       | PMCA-1       | PMCA      | CG34036.C | NP_001014687.3 | plasma membrane calcium ATPase                  |
| 827.0262 | 466.2330  | 39.7   | EADIDGGQVNYEEFVTMM     | y4       | light       | CAM-2        | Cam       | CG8472    | NP_523710.1    | Calmodulin                                      |
| 827.0262 | 597.2735  | 39.7   | EADIDGGQVNYEEFVTMM     | y5       | light       | CAM-2        | Cam       | CG8472    | NP_523710.1    | Calmodulin                                      |
| 827.0262 | 698.3212  | 39.7   | EADIDGGQVNYEEFVTMM     | y6       | light       | CAM-2        | Cam       | CG8472    | NP_523710.1    | Calmodulin                                      |
| 827.0262 | 797.3896  | 39.7   | EADIDGGQVNYEEFVTMM     | y7       | light       | CAM-2        | Cam       | CG8472    | NP_523710.1    | Calmodulin                                      |
| 829.6928 | 474.2330  | 39.7   | EADIDGGQVNYEEFVTMM     | y4       | heavy       | CAM-2        | Cam       | CG8472    | NP_523710.1    | Calmodulin                                      |
| 829.6928 | 605.2735  | 39.7   | EADIDGGQVNYEEFVTMM     | y5       | heavy       | CAM-2        | Cam       | CG8472    | NP_523710.1    | Calmodulin                                      |
| 829.6928 | 706.3212  | 39.7   | EADIDGGQVNYEEFVTMM     | y6       | heavy       | CAM-2        | Cam       | CG8472    | NP_523710.1    | Calmodulin                                      |
| 829.6928 | 805.3896  | 39.7   | EADIDGGQVNYEEFVTMM     | y7       | heavy       | CAM-2        | Cam       | CG8472    | NP_523710.1    | Calmodulin                                      |
| 847.0889 | 460.2766  | 40.6   | NIHSGEESSAISVNSPLEDILA | y4       | light       | Insp3R-2     | Itpr-r83A | CG1063    | NP_730941.1    | Inositol 1,4,5,-tris-phosphate receptor         |
| 847.0889 | 573.3606  | 40.6   | NIHSGEESSAISVNSPLEDILA | y5       | light       | Insp3R-2     | Itpr-r83A | CG1063    | NP_730941.1    | Inositol 1,4,5,-tris-phosphate receptor         |
| 847.0889 | 688.3876  | 40.6   | NIHSGEESSAISVNSPLEDILA | y6       | light       | Insp3R-2     | Itpr-r83A | CG1063    | NP_730941.1    | Inositol 1,4,5,-tris-phosphate receptor         |
| 847.0889 | 817.4302  | 40.6   | NIHSGEESSAISVNSPLEDILA | y7       | light       | Insp3R-2     | Itpr-r83A | CG1063    | NP_730941.1    | Inositol 1,4,5,-tris-phosphate receptor         |
| 848.4089 | 448.2402  | 32.2   | TMAISSELTNAESDVK       | y4       | light       | Inr-1        | Inr       | CG18402   | NP_524436.2    | Insulin-like receptor                           |
| 848.4089 | 762.3628  | 32.2   | TMAISSELTNAESDVK       | y7       | light       | Inr-1        | Inr       | CG18402   | NP_524436.2    | Insulin-like receptor                           |
| 848.4089 | 863.4105  | 32.2   | TMAISSELTNAESDVK       | y8       | light       | Inr-1        | Inr       | CG18402   | NP_524436.2    | Insulin-like receptor                           |
| 848.4089 | 976.4946  | 32.2   | TMAISSELTNAESDVK       | y9       | light       | Inr-1        | Inr       | CG18402   | NP_524436.2    | Insulin-like receptor                           |
| 849.7556 | 468.2766  | 40.6   | NIHSGEESSAISVNSPLEDILA | y4       | heavy       | Insp3R-2     | Itpr-r83A | CG1063    | NP_730941.1    | Inositol 1,4,5,-tris-phosphate receptor         |
| 849.7556 | 581.3606  | 40.6   | NIHSGEESSAISVNSPLEDILA | y5       | heavy       | Insp3R-2     | Itpr-r83A | CG1063    | NP_730941.1    | Inositol 1,4,5,-tris-phosphate receptor         |
| 849.7556 | 696.3876  | 40.6   | NIHSGEESSAISVNSPLEDILA | y6       | heavy       | Insp3R-2     | Itpr-r83A | CG1063    | NP_730941.1    | Inositol 1,4,5,-tris-phosphate receptor         |
| 849.7556 | 825.4302  | 40.6   | NIHSGEESSAISVNSPLEDILA | y7       | heavy       | Insp3R-2     | Itpr-r83A | CG1063    | NP_730941.1    | Inositol 1,4,5,-tris-phosphate receptor         |
| 852.4089 | 456.2402  | 32.2   | TMAISSELTNAESDVK       | y4       | heavy       | Inr-1        | Inr       | CG18402   | NP_524436.2    | Insulin-like receptor                           |
| 852.4089 | 770.3628  | 32.2   | TMAISSELTNAESDVK       | y7       | heavy       | Inr-1        | Inr       | CG18402   | NP_524436.2    | Insulin-like receptor                           |
| 852.4089 | 871.4105  | 32.2   | TMAISSELTNAESDVK       | y8       | heavy       | Inr-1        | Inr       | CG18402   | NP_524436.2    | Insulin-like receptor                           |
| 852.4089 | 984.4946  | 32.2   | TMAISSELTNAESDVK       | y9       | heavy       | Inr-1        | Inr       | CG18402   | NP_524436.2    | Insulin-like receptor                           |
| 871.3780 | 742.2825  | 32.9   | TLWDDAGIQEYDQR         | y5       | light       | GAQ-1        | CG9911    | CG17759   | NP_523718.1    | G protein alpha498                              |
| 871.3780 | 870.3410  | 32.9   | TLWDDAGIQEYDQR         | y6       | light       | GAQ-1        | CG9911    | CG17759   | NP_523718.1    | G protein alpha498                              |
| 871.3780 | 1040.4466 | 32.9   | TLWDDAGIQEYDQR         | y8       | light       | GAQ-1        | CG9911    | CG17759   | NP_523718.1    | G protein alpha498                              |
| 876.3780 | 752.2825  | 32.9   | TLWDDAGIQEYDQR         | y5       | heavy       | GAQ-1        | CG9911    | CG17759   | NP_523718.1    | G protein alpha498                              |
| 876.3780 | 880.3410  | 32.9   | TLWDDAGIQEYDQR         | y6       | heavy       | GAQ-1        | CG9911    | CG17759   | NP_523718.1    | G protein alpha498                              |
| 876.3780 | 1050.4466 | 32.9   | TLWDDAGIQEYDQR         | y8       | heavy       | GAQ-1        | CG9911    | CG17759   | NP_523718.1    | G protein alpha498                              |
| 882.9103 | 532.3089  | 33.3   | ITNSTEDLDDESIGK        | y5       | light       | STIM-1       | Stim      | CG9126    | NP_996470.1    | Stromal interaction molecule                    |
| 882.9103 | 776.3785  | 33.3   | ITNSTEDLDDESIGK        | y7       | light       | STIM-1       | Stim      | CG9126    | NP_996470.1    | Stromal interaction molecule                    |
| 882.9103 | 891.4054  | 33.3   | ITNSTEDLDDESIGK        | y8       | light       | STIM-1       | Stim      | CG9126    | NP_996470.1    | Stromal interaction molecule                    |
| 886.9103 | 540.3089  | 33.3   | ITNSTEDLDDESIGK        | y5       | heavy       | STIM-1       | Stim      | CG9126    | NP_996470.1    | Stromal interaction molecule                    |
| 886.9103 | 784.3785  | 33.3   | ITNSTEDLDDESIGK        | y7       | heavy       | STIM-1       | Stim      | CG9126    | NP_996470.1    | Stromal interaction molecule                    |
| 886.9103 | 899.4054  | 33.3   | ITNSTEDLDDESIGK        | y8       | heavy       | STIM-1       | Stim      | CG9126    | NP_996470.1    | Stromal interaction molecule                    |
| 894.9435 | 530.3297  | 33.7   | AMSAAVADADGEQIELR      | y4       | light       | Insp3R-3     | Itpr-r83A | CG1063    | NP_730941.1    | Inositol 1,4,5,-tris-phosphate receptor         |
| 894.9435 | 658.3883  | 33.7   | AMSAAVADADGEQIELR      | y5       | light       | Insp3R-3     | Itpr-r83A | CG1063    | NP_730941.1    | Inositol 1,4,5,-tris-phosphate receptor         |
| 894.9435 | 844.4523  | 33.7   | AMSAAVADADGEQIELR      | y7       | light       | Insp3R-3     | Itpr-r83A | CG1063    | NP_730941.1    | Inositol 1,4,5,-tris-phosphate receptor         |
| 894.9435 | 959.4793  | 33.7   | AMSAAVADADGEQIELR      | y8       | light       | Insp3R-3     | Itpr-r83A | CG1063    | NP_730941.1    | Inositol 1,4,5,-tris-phosphate receptor         |
| 899.9435 | 540.3297  | 33.7   | AMSAAVADADGEQIELR      | y4       | heavy       | Insp3R-3     | Itpr-r83A | CG1063    | NP_730941.1    | Inositol 1,4,5,-tris-phosphate receptor         |
| 899.9435 | 668.3883  | 33.7   | AMSAAVADADGEQIELR      | y5       | heavy       | Insp3R-3     | Itpr-r83A | CG1063    | NP_730941.1    | Inositol 1,4,5,-tris-phosphate receptor         |
| 899.9435 | 854.4523  | 33.7   | AMSAAVADADGEQIELR      | y7       | heavy       | Insp3R-3     | Itpr-r83A | CG1063    | NP_730941.1    | Inositol 1,4,5,-tris-phosphate receptor         |
| 899.9435 | 969.4793  | 33.7   | AMSAAVADADGEQIELR      | y8       | heavy       | Insp3R-3     | Itpr-r83A | CG1063    | NP_730941.1    | Inositol 1,4,5,-tris-phosphate receptor         |
| 973.4893 | 516.3140  | 36.4   | EAPTLSSNSDLEVQQLK      | y4       | light       | STIM-3       | Stim      | CG9126    | NP_996470.1    | Stromal interaction molecule                    |
| 973.4893 | 615.3824  | 36.4   | EAPTLSSNSDLEVQQLK      | y5       | light       | STIM-3       | Stim      | CG9126    | NP_996470.1    | Stromal interaction molecule                    |
| 973.4893 | 744.4250  | 36.4   | EAPTLSSNSDLEVQQLK      | y6       | light       | STIM-3       | Stim      | CG9126    | NP_996470.1    | Stromal interaction molecule                    |
| 973.4893 | 857.5091  | 36.4   | EAPTLSSNSDLEVQQLK      | y7       | light       | STIM-3       | Stim      | CG9126    | NP_996470.1    | Stromal interaction molecule                    |
| 977.4893 | 524.3140  | 36.4   | EAPTLSSNSDLEVQQLK      | y4       | heavy       | STIM-3       | Stim      | CG9126    | NP_996470.1    | Stromal interaction molecule                    |
| 977.4893 | 623.3824  | 36.4   | EAPTLSSNSDLEVQQLK      | y5       | heavy       | STIM-3       | Stim      | CG9126    | NP_996470.1    | Stromal interaction molecule                    |
| 977.4893 | 752.4250  | 36.4   | EAPTLSSNSDLEVQQLK      | y6       | heavy       | STIM-3       | Stim      | CG9126    | NP_996470.1    | Stromal interaction molecule                    |
| 536.3241 | 845.4727  | 21.5   | IIILGDSGVGK            | y9       | light       | CG32679      | Rab9D     | CG32678   | NP_727432.1    | Rab GTPase 9D                                   |
| 546.7878 | 879.4571  | 21.9   | VNFTVDEIR              | y7       | light       | CG2238       | Elf2b     | CG2238    | NP_525105.2    | Elongation factor 2b                            |
| 547.2875 | 638.3297  | 21.9   | LNDFGTWK               | y5       | light       | CG5502       | RpL4      | CG5502    | NP_524538.2    | Ribosomal Protein L4                            |
| 611.8213 | 1024.4986 | 24.1   | VVELDFEPK              | y8       | light       | CG7490       | RpLP0     | CG7490    | NP_524211.1    | Ribosomal protein LP0                           |
| 611.8613 | 796.4676  | 24.1   | VILVDGPTGVPR           | y8       | light       | CG6253       | RpL14     | CG6253    | NP_523975.1    | Ribosomal protein L14                           |
| 638.8666 | 818.4367  | 25     | VFIVTGANTGK            | y9       | light       | CG2064       | CG2064    | CG2064    | NP_610310.2    | CG2064 gene product from transcript CG2064-RA   |
| 644.8375 | 774.4104  | 25.2   | GLCIAQAQESLR           | y7       | light       | CG6779       | RpS3      | CG6779    | NP_476632.1    | Ribosomal protein S3                            |
| 649.8512 | 803.4258  | 25.4   | DIPGLDTITPR            | y7       | light       | CG10944      | RpS6      | CG10944   | NP_511073.1    | Ribosomal protein S6                            |
| 714.3239 | 794.3648  | 27.6   | FDSNGLCMGTGR           | y7       | light       | CG11276      | RpS4      | CG11276   | NP_729871.1    | Ribosomal protein S4                            |
| 715.8767 | 805.3873  | 27.7   | NIWVIAECVAK            | y7       | light       | CG2934       | VhaA39    | CG2934    | NP_570080.1    | CG2934 gene product from transcript CG2934-RA   |
| 716.8619 | 503.2824  | 27.7   | EAGEDTTILNLK           | y4       | light       | CG13887      | CG13887   | CG13887   | NP_612062.1    | CG13887 gene product from transcript CG13887-RC |
| 739.8779 | 1022.5153 | 28.5   | TAANVFIEFINTAK         | y9       | light       | CG3269       | Rab2      | CG3269    | NP_477090.1    | Rab-protein 2                                   |
| 743.3808 | 685.3991  | 28.6   | GVVDSDPLNVRSR          | y6       | light       | CG5520       | Gp93      | CG5520    | NP_651601.1    | Glycoprotein 93                                 |
| 780.3999 | 919.4381  | 29.8   | GLQLTQPNNTNFGK         | y8       | light       | CG3922       | RpS17     | CG4326    | NP_524002.1    | Ribosomal protein S17                           |
| 865.4282 | 872.4724  | 32.7   | EAAAGEDIPLADESIK       | y8       | light       | CG13388      | Akap200   | CG13388   | NP_477459.1    | A kinase anchor protein 200                     |

**Supp. Table 2: Heavy Peptide Mix**

| Heavy Peptides | Concentration (pmol/ul) | ul / Mix | Final volume of stock solution | Final concentration in stock (pmol/ul) |
|----------------|-------------------------|----------|--------------------------------|----------------------------------------|
| CalRet         | 5.0                     | 50.0     | 2050                           | 0.1220                                 |
| CAM1           | 5.0                     | 50.0     | 2050                           | 0.1220                                 |
| CAM2           | 5.0                     | 50.0     | 2050                           | 0.1220                                 |
| CAM3           | 5.0                     | 25.0     | 2050                           | 0.0610                                 |
| DISIS1         | 3.4                     | 50.0     | 2050                           | 0.0829                                 |
| ERP44          | 2.9                     | 16.6     | 2050                           | 0.0235                                 |
| GAQ1           | 4.3                     | 25.0     | 2050                           | 0.0524                                 |
| InR1           | 6.8                     | 16.6     | 2050                           | 0.0551                                 |
| InsP3R-1       | 5.0                     | 5.0      | 2050                           | 0.0122                                 |
| InsP3R-2       | 5.0                     | 16.6     | 2050                           | 0.0405                                 |
| InsP3R-3       | 5.0                     | 50.0     | 2050                           | 0.1220                                 |
| MITCAR1        | 5.0                     | 50.0     | 2050                           | 0.1220                                 |
| ORAI1          | 5.0                     | 16.6     | 2050                           | 0.0405                                 |
| ORAI2          | 5.0                     | 5.0      | 2050                           | 0.0122                                 |
| ORAI3          | 5.0                     | 5.0      | 2050                           | 0.0122                                 |
| PLCNORP        | 8.1                     | 16.6     | 2050                           | 0.0656                                 |
| PMCA1          | 5.0                     | 25.0     | 2050                           | 0.0610                                 |
| PMCA2          | 5.0                     | 50.0     | 2050                           | 0.1220                                 |
| PMCA3          | 5.0                     | 50.0     | 2050                           | 0.1220                                 |
| PRESEN1        | 5.7                     | 75.0     | 2050                           | 0.2085                                 |
| SERCA1         | 5.0                     | 50.0     | 2050                           | 0.1220                                 |
| SERCA2         | 5.0                     | 50.0     | 2050                           | 0.1220                                 |
| SERCA3         | 5.0                     | 25.0     | 2050                           | 0.0610                                 |
| STIM1          | 5.0                     | 25.0     | 2050                           | 0.0610                                 |
| STIM2          | 5.0                     | 50.0     | 2050                           | 0.1220                                 |
| STIM3          | 5.0                     | 25.0     | 2050                           | 0.0610                                 |

**Supp. Table 3: Primers used to make dsRNA**

| <b>Primer Name</b> | <b>Primer Sequence</b>                                        |
|--------------------|---------------------------------------------------------------|
| STIM_forward       | TAATACGACTCACTATAGGGCAGAACATTCTCCAAGTAGGGC                    |
| STIM_reverse       | TAATACGACTCACTATAGGGAAAACTAGATTTGGAGCGTCG                     |
| PMCA_forward       | TAATACGACTCACTATAGGGAATGCTTCACCAAGTTATTGGC                    |
| PMCA_reverse       | TAATACGACTCACTATAGGGATGGTCGATCGCAAATAAAGG                     |
| SERCA_forward      | TAATACGACTCACTATAGGGCTGCTGACTACGATACCCTGC                     |
| SERCA_reverse      | TAATACGACTCACTATAGGGGACAATGGAATCGAAAACCTCC                    |
| YFP_forward        | GCGTAATACGACTCACTATAGGCATCCTGGTCGAGCTGGAC                     |
| YFP_reverse        | GCGTAATACGACTCACTATAGGCGTTGGGGTCTTTGCTCAG                     |
| GL3_forward        | GCGTAATACGACTCACTATAGGGCGGTTCGGTAAAGTTGTTC                    |
| GL3_reverse        | GCGTAATACGACTCACTATAGGTCTTGCGTCGAGTTTTCCG                     |
| MICU1-1_forward    | TAA TAC GAC TCA CTA TAG GGA CTC GGC TTT GAT CAC ATA<br>TTT C  |
| MICU1-1_reverse    | TAA TAC GAC TCA CTA TAG GGT TCT CAT CAA AGA TGG TAA<br>AGA CC |
| MICU1-2_forward    | TAA TAC GAC TCA CTA TAG GGT GCA GAA CTC CTA CTG GCC<br>TAC    |
| MICU1-2_reverse    | TAA TAC GAC TCA CTA TAG GGT TCT CAT CAA AGA TGG TAA<br>AGA CC |
| CALX-1_forward     | TAA TAC GAC TCA CTA TAG GGT GTA GCG AGG GTC TTG TCC           |
| CALX-1_reverse     | TAA TAC GAC TCA CTA TAG GGG CGG TAA CGA AGA AGA CTC           |
| CALX-2_forward     | TAA TAC GAC TCA CTA TAG GGT ACG TGA GCC ACT TCG TC            |
| CALX-2_reverse     | TAA TAC GAC TCA CTA TAG GGC ATG CTG GCG AAT GTA TC            |
